# Supplementary material
Source: HighWire-hosted journal article supplement (http://ghspjournal.org/highwire/filestream/1605/field_highwire_adjunct_files/0/16-00233-Mishori-Supplement.pdf)
Supplement: 16-00233-Mishori-Supplement.pdf [file 16-00233-Mishori-Supplement.pdf]

Mishori R, Anastario M, Naimer K, et al. mJustice: preliminary development of a mobile app for medical-forensic documentation of sexual violence in low-resource environments and conflict zones. *Glob Health Sci Pract.* 2017;5(1). <http://dx.doi.org/10.9745/GHSP-D-16-00233>

**SUPPLEMENT TABLE.** Average Usability Scores for the MediCapt 2.0 Prototype App (N=9)

|                                                                                                                                                                                  | Mean | SD   |
|----------------------------------------------------------------------------------------------------------------------------------------------------------------------------------|------|------|
| <b>Usability on Mobile Phones</b>                                                                                                                                                |      |      |
| The screen of the smartphone is too small.                                                                                                                                       | 0.41 | 0.22 |
| The smartphone should be larger.                                                                                                                                                 | 0.67 | 0.29 |
| It is easy to type on the smartphone.                                                                                                                                            | 0.82 | 0.17 |
| It is easy to use the touch screen on the smartphone.                                                                                                                            | 0.82 | 0.24 |
| The smartphone itself appears to be suitable to document sexual assault examinations.                                                                                            | 0.85 | 0.17 |
| It is easy for me to hold the smartphone.                                                                                                                                        | 0.85 | 0.17 |
| It is easy to take photographs using the smartphone.                                                                                                                             | 0.93 | 0.15 |
| <b>Usability on Tablets</b>                                                                                                                                                      |      |      |
| The tablet should be smaller.                                                                                                                                                    | 0.41 | 0.36 |
| The screen of the tablet is too large.                                                                                                                                           | 0.55 | 0.37 |
| The tablet itself appears to be suitable to document sexual assault examinations.                                                                                                | 0.78 | 0.24 |
| It is easy for me to hold the tablet.                                                                                                                                            | 0.78 | 0.29 |
| It is easy to type on the tablet.                                                                                                                                                | 0.89 | 0.17 |
| It is easy to use the touch screen on the tablet.                                                                                                                                | 0.89 | 0.17 |
| It is easy to take photographs using the tablet.                                                                                                                                 | 0.93 | 0.15 |
| <b>Appropriateness of the MediCapt App</b>                                                                                                                                       |      |      |
| It will be easy to use MediCapt while I am conducting a sexual assault examination on a patient.                                                                                 | 0.89 | 0.17 |
| My patients will be better served if I use MediCapt.                                                                                                                             | 0.89 | 0.17 |
| MediCapt will help me save time in conducting sexual assault examinations.                                                                                                       | 0.93 | 0.15 |
| MediCapt will help me do a better job of documenting sexual assault examinations.                                                                                                | 0.96 | 0.11 |
| <b>Acceptability of the MediCapt App</b>                                                                                                                                         |      |      |
| The use of MediCapt with a sexual violence patient is culturally unacceptable.                                                                                                   | 0.19 | 0.17 |
| There are cases where I would NOT use MediCapt with a sexual violence patient.                                                                                                   | 0.41 | 0.33 |
| I would need special training in order to use MediCapt with a patient during an examination.                                                                                     | 0.52 | 0.34 |
| I currently complete a paper-based medical certificate for examinations of sexual violence patients.                                                                             | 0.63 | 0.26 |
| I think that the forensic photography function on MediCapt will make it more comfortable for my patients to be photographed, versus using a separate camera to take photographs. | 0.78 | 0.17 |
| I think that sexual violence patients would accept my use of MediCapt during their examination.                                                                                  | 0.82 | 0.17 |

Mishori R, Anastario M, Naimer K, et al. mJustice: preliminary development of a mobile app for medical-forensic documentation of sexual violence in low-resource environments and conflict zones. *Glob Health Sci Pract.* 2016;5(1). <http://dx.doi.org/10.9745/GHSP-D-16-00233>

|                                                                                                                          | Mean | SD   |
|--------------------------------------------------------------------------------------------------------------------------|------|------|
| I would be comfortable using MediCapt in my clinical practice.                                                           | 0.89 | 0.17 |
| I like to use new types of technology to help my patients.                                                               | 0.93 | 0.15 |
| Overall, I am satisfied with MediCapt.                                                                                   | 0.93 | 0.15 |
| <b>Feasibility and Sustainability of the MediCapt App</b>                                                                |      |      |
| It will be difficult to charge the smartphones or tablets on a daily basis.                                              | 0.26 | 0.32 |
| The device is likely to get stolen.                                                                                      | 0.29 | 0.11 |
| I may have to rely on a generator to charge smartphones or tablets on a daily basis.                                     | 0.30 | 0.35 |
| I am likely to lose my device.                                                                                           | 0.33 | 0.17 |
| I think connection to the Internet will be a major problem for uploading files.                                          | 0.37 | 0.35 |
| I expect that it will be difficult to get reliable Wi-Fi or Internet access to transmit the files.                       | 0.48 | 0.41 |
| Additional measures will need to be put into place to make sure this device gets used.                                   | 0.59 | 0.15 |
| MediCapt is better than what I am currently using to document sexual assaults.                                           | 0.79 | 0.25 |
| The app “made sense.”                                                                                                    | 0.82 | 0.17 |
| I will be able to take forensic photographs easily using MediCapt.                                                       | 0.82 | 0.34 |
| I have Wi-Fi or other Internet access in my community health care center.                                                | 0.82 | 0.17 |
| I have access to reliable electricity in my community or health care center.                                             | 0.85 | 0.17 |
| My colleagues will be happy using MediCapt.                                                                              | 0.89 | 0.17 |
| I have had enough training to use MediCapt correctly.                                                                    | 0.89 | 0.17 |
| Health care professionals who use MediCapt will take better forensic photographs because they are using MediCapt.        | 0.89 | 0.17 |
| MediCapt is intuitive to my needs when documenting sexual assault examinations.                                          | 0.93 | 0.15 |
| In reality, I could see MediCapt being used at my health care center/clinic.                                             | 0.93 | 0.15 |
| I could one day train my colleagues on how to use MediCapt to document sexual assault examinations.                      | 0.93 | 0.15 |
| MediCapt will help me save time in documentation.                                                                        | 0.93 | 0.15 |
| MediCapt will ensure that sexual assault records are transferred to the appropriate law enforcement and legal personnel. | 0.93 | 0.15 |

Abbreviation: SD, standard deviation.
